# Supplementary material
Source: MDPI journal article supplement (https://www.mdpi.com/2227-9717/10/4/792)
Supplement: s1 [file s1]

*Supporting Information For:*

# **The Impact of Berberine Pharmaceutical Wastewater on Aerobic Granules Formation: Change of Granules' Size**

**Ping Zeng <sup>1,2</sup>, Yan Wang <sup>1,2</sup>, Yongqiang Liu <sup>3</sup>, Juan Li <sup>1,2</sup>, Fenghua Liu <sup>4</sup>, Ming Chang <sup>1,\*</sup> and Yizhang Zhang <sup>1,5,\*</sup>**

<sup>1</sup> State Key Laboratory of Environmental Criteria and Risk Assessment, Chinese Research Academy of Environmental Sciences, Beijing 100012, China; zengping@craes.org.cn (P.Z.); wskye626@163.com (Y.W.); lij@126.com (J.L.)

<sup>2</sup> Department of Urban Water Environmental Research, Chinese Research Academy of Environmental Sciences, Beijing 100012, China

<sup>3</sup> Faculty of Engineering and the Environment, University of Southampton, Southampton SO17 1BJ, UK; y.liu@soton.ac.uk

<sup>4</sup> CECEP Engineering Technology Research Institute Co. Ltd., Beijing 100082, China; fenghua.liu@talroad.com

<sup>5</sup> Research Institute for Environmental Innovation (Tianjin Binhai), Tianjin 300457, China

\* Correspondence: changming@craes.org.cn (M.C.); zhangyz\_hky@163.com (Y.Z.)

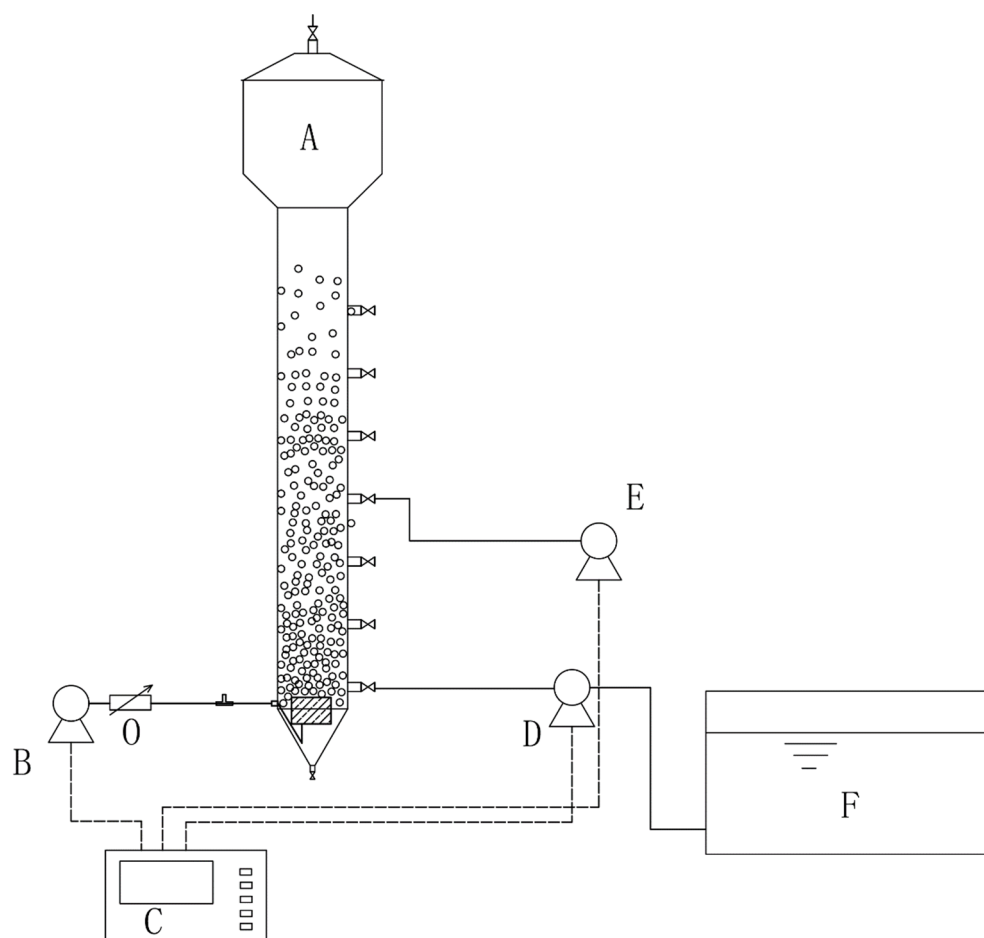

Figure S1. The image of aerobic granular system. A: SBR reactor, B: air pump, C: timer、 D: influent pump, E: effluent pump, F: influent tank.

**Table S1. Physical and chemical properties of aerobic sludge as inoculum.**

| Reactor | Particle size<br>( $\mu\text{m}$ ) | SVI (ml/g)       | MLSS (mg/L)      | MLVSS/MLSS (%) |
|---------|------------------------------------|------------------|------------------|----------------|
| R1      | 62.84 $\pm$ 3.04                   | 102.4 $\pm$ 4.98 | 2147 $\pm$ 105.7 | 47             |
| R2      | 60.12 $\pm$ 2.91                   | 98.60 $\pm$ 4.83 | 2363 $\pm$ 110.2 | 39             |
| R3      | 51.64 $\pm$ 2.34                   | 95.70 $\pm$ 4.71 | 2350 $\pm$ 103.4 | 27             |

**Table S2. The composition of influent wastewater.**

| Components                           | Concentration(mg/L) |       |       |
|--------------------------------------|---------------------|-------|-------|
|                                      | R1                  | R2    | R3    |
| COD                                  | 2000                | 2000  | 2000  |
| NH <sub>4</sub> Cl                   | 200                 | 200   | -     |
| KH <sub>2</sub> PO <sub>4</sub>      | 35                  | 35    | -     |
| CaCl <sub>2</sub> ·2H <sub>2</sub> O | 30                  | 30    | -     |
| MgSO <sub>4</sub> ·7H <sub>2</sub> O | 25                  | 25    | -     |
| FeSO <sub>4</sub> ·7H <sub>2</sub> O | 20                  | 20    | -     |
| Berberine                            | -                   | 10-15 | 10-15 |

Table S3. The characteristics of aerobic granules' diameter in R1.

| Time<br>(day) | Settling<br>time<br>(min) | d (0.1)<br>( $\mu\text{m}$ ) | d (0.5)<br>( $\mu\text{m}$ ) | d(0.9)<br>( $\mu\text{m}$ ) | D[3,2]<br>( $\mu\text{m}$ ) | D[4,3]<br>( $\mu\text{m}$ ) | Specific<br>surface<br>area<br>( $\text{m}^2/\text{g}$ ) | Dia<br>mete<br>r<br>dista<br>nce | Consi<br>stenc<br>e |
|---------------|---------------------------|------------------------------|------------------------------|-----------------------------|-----------------------------|-----------------------------|----------------------------------------------------------|----------------------------------|---------------------|
| 1             | 30                        | 19.83                        | 50.62                        | 111.82                      | 35.31                       | 62.84                       | 0.17                                                     | 1.82                             | 0.63                |
| 4             | 10                        | 54.86                        | 126.54                       | 275.43                      | 93.21                       | 148.87                      | 0.06                                                     | 1.74                             | 0.54                |
| 11            | 10                        | 93.41                        | 243.71                       | 529.65                      | 174.59                      | 281.48                      | 0.03                                                     | 1.79                             | 0.55                |
| 13            | 10                        | 68.76                        | 185.12                       | 471.43                      | 130.83                      | 232.31                      | 0.05                                                     | 2.18                             | 0.67                |
| 15            | 10                        | 72.40                        | 187.44                       | 478.64                      | 136.43                      | 236.74                      | 0.04                                                     | 2.17                             | 0.67                |
| 18            | 10                        | 78.53                        | 202.28                       | 491.62                      | 143.55                      | 248.60                      | 0.04                                                     | 2.04                             | 0.63                |
| 20            | 5                         | 100.93                       | 261.71                       | 304.53                      | 184.21                      | 304.53                      | 0.03                                                     | 1.82                             | 0.56                |
| 22            | 5                         | 95.08                        | 267.11                       | 598.32                      | 180.18                      | 311.22                      | 0.03                                                     | 1.88                             | 0.58                |
| 24            | 5                         | 94.80                        | 301.19                       | 706.52                      | 185.34                      | 356.42                      | 0.03                                                     | 2.03                             | 0.63                |
| 28            | 5                         | 84.15                        | 294.57                       | 734.93                      | 164.48                      | 358.46                      | 0.04                                                     | 2.21                             | 0.69                |
| 33            | 5                         | 78.35                        | 241.81                       | 616.17                      | 141.17                      | 300.42                      | 0.04                                                     | 2.22                             | 0.69                |
| 36            | 5                         | 93.30                        | 259.61                       | 621.26                      | 163.97                      | 313.56                      | 0.04                                                     | 2.03                             | 0.63                |
| 40            | 5                         | 114.48                       | 288.09                       | 647.84                      | 201.39                      | 339.44                      | 0.03                                                     | 1.85                             | 0.57                |
| 43            | 5                         | 128.69                       | 299.41                       | 668.53                      | 243.18                      | 345.65                      | 0.02                                                     | 1.80                             | 0.55                |
| 51            | 5                         | 167.77                       | 348.18                       | 656.32                      | 267.48                      | 382.56                      | 0.02                                                     | 1.40                             | 0.43                |
| 57            | 5                         | 194.47                       | 385.42                       | 700.10                      | 315.33                      | 418.94                      | 0.02                                                     | 1.31                             | 0.41                |
| 61            | 5                         | 200.40                       | 421.93                       | 781.42                      | 330.33                      | 459.33                      | 0.02                                                     | 1.38                             | 0.43                |
| 64            | 5                         | 228.75                       | 452.91                       | 795.28                      | 362.54                      | 484.33                      | 0.02                                                     | 1.25                             | 0.39                |
| 67            | 5                         | 225.37                       | 475.92                       | 849.79                      | 343.39                      | 508.69                      | 0.02                                                     | 1.31                             | 0.40                |
| 70            | 5                         | 223.79                       | 481.48                       | 862.49                      | 361.65                      | 514.56                      | 0.02                                                     | 1.33                             | 0.41                |
| 74            | 5                         | 238.74                       | 494.29                       | 861.96                      | 360.47                      | 523.47                      | 0.02                                                     | 1.26                             | 0.39                |
| 81            | 5                         | 120.18                       | 435.07                       | 838.97                      | 236.47                      | 463.49                      | 0.03                                                     | 1.65                             | 0.50                |

Table S4. The characteristics of aerobic granules' diameter in R2.

| Time<br>(day) | Settling<br>time<br>(min) | d (0.1)<br>( $\mu\text{m}$ ) | d (0.5)<br>( $\mu\text{m}$ ) | d (0.9)<br>( $\mu\text{m}$ ) | D[3,2]<br>( $\mu\text{m}$ ) | D[4,3]<br>( $\mu\text{m}$ ) | Specific<br>surface<br>area<br>( $\text{m}^2/\text{g}$ ) | Diam<br>eter<br>distan<br>ce | Consist<br>ence |
|---------------|---------------------------|------------------------------|------------------------------|------------------------------|-----------------------------|-----------------------------|----------------------------------------------------------|------------------------------|-----------------|
| 1             | 30                        | 20.13                        | 50.53                        | 107.67                       | 35.36                       | 60.12                       | 0.17                                                     | 1.73                         | 0.58            |
| 4             | 10                        | 50.36                        | 119.52                       | 272.29                       | 87.44                       | 145.08                      | 0.07                                                     | 1.88                         | 0.59            |
| 6             | 10                        | 69.05                        | 168.50                       | 382.88                       | 123.57                      | 200.87                      | 0.05                                                     | 1.86                         | 0.57            |
| 11            | 10                        | 72.41                        | 212.84                       | 532.36                       | 139.68                      | 263.70                      | 0.04                                                     | 2.16                         | 0.67            |
| 13            | 10                        | 58.37                        | 188.82                       | 572.50                       | 115.02                      | 259.70                      | 0.05                                                     | 2.72                         | 0.84            |
| 15            | 10                        | 59.02                        | 180.80                       | 525.55                       | 109.21                      | 242.89                      | 0.05                                                     | 2.58                         | 0.80            |
| 18            | 10                        | 55.22                        | 158.75                       | 552.03                       | 99.79                       | 238.92                      | 0.06                                                     | 3.13                         | 0.94            |
| 20            | 5                         | 73.37                        | 223.95                       | 609.23                       | 139.20                      | 289.02                      | 0.04                                                     | 2.39                         | 0.74            |
| 22            | 5                         | 65.85                        | 199.05                       | 572.37                       | 120.20                      | 264.98                      | 0.05                                                     | 2.55                         | 0.78            |
| 24            | 5                         | 74.15                        | 214.34                       | 603.95                       | 132.58                      | 283.13                      | 0.05                                                     | 2.47                         | 0.76            |
| 28            | 5                         | 91.91                        | 256.01                       | 649.95                       | 163.23                      | 319.60                      | 0.04                                                     | 2.18                         | 0.67            |
| 33            | 5                         | 108.37                       | 284.52                       | 691.57                       | 192.77                      | 348.29                      | 0.03                                                     | 2.05                         | 0.63            |
| 36            | 5                         | 101.62                       | 261.33                       | 638.64                       | 180.52                      | 321.96                      | 0.03                                                     | 2.06                         | 0.63            |
| 40            | 5                         | 96.73                        | 235.17                       | 550.16                       | 161.35                      | 285.04                      | 0.04                                                     | 1.93                         | 0.60            |
| 43            | 5                         | 118.52                       | 274.06                       | 623.49                       | 206.65                      | 328.55                      | 0.03                                                     | 1.84                         | 0.57            |
| 51            | 5                         | 212.71                       | 371.61                       | 635.77                       | 338.75                      | 400.96                      | 0.02                                                     | 1.14                         | 0.35            |
| 57            | 5                         | 193.08                       | 390.81                       | 679.68                       | 310.13                      | 414.96                      | 0.02                                                     | 1.25                         | 0.39            |
| 61            | 5                         | 204.68                       | 460.46                       | 829.26                       | 328.34                      | 491.45                      | 0.02                                                     | 1.36                         | 0.42            |
| 64            | 5                         | 238.24                       | 482.37                       | 832.89                       | 374.99                      | 510.38                      | 0.02                                                     | 1.23                         | 0.38            |
| 67            | 5                         | 276.39                       | 519.11                       | 873.86                       | 404.98                      | 547.08                      | 0.01                                                     | 1.15                         | 0.36            |
| 70            | 5                         | 171.98                       | 496.03                       | 890.37                       | 289.01                      | 520.39                      | 0.02                                                     | 1.45                         | 0.43            |
| 74            | 5                         | 231.14                       | 553.79                       | 968.31                       | 323.86                      | 579.51                      | 0.02                                                     | 1.33                         | 0.41            |
| 81            | 5                         | 130.72                       | 451.54                       | 878.02                       | 243.67                      | 483.14                      | 0.02                                                     | 1.66                         | 0.51            |

Table S5. The characteristics of aerobic granules' diameter in R3.

| Time<br>(day) | Settling<br>time<br>(min) | d (0.1)<br>( $\mu\text{m}$ ) | d (0.5)<br>( $\mu\text{m}$ ) | d (0.9)<br>( $\mu\text{m}$ ) | D[3,2]<br>( $\mu\text{m}$ ) | D[4,3]<br>( $\mu\text{m}$ ) | Specific<br>surface<br>area<br>( $\text{m}^2/\text{g}$ ) | Diameter<br>distance | Con<br>siste<br>nce |
|---------------|---------------------------|------------------------------|------------------------------|------------------------------|-----------------------------|-----------------------------|----------------------------------------------------------|----------------------|---------------------|
| 1             | 30                        | 20.28                        | 45.94                        | 91.50                        | 34.50                       | 51.64                       | 0.17                                                     | 1.55                 | 0.48                |
| 4             | 10                        | 51.72                        | 121.87                       | 271.74                       | 89.54                       | 145.26                      | 0.07                                                     | 1.81                 | 0.56                |
| 6             | 10                        | 70.12                        | 164.11                       | 352.52                       | 122.29                      | 190.36                      | 0.05                                                     | 1.72                 | 0.53                |
| 11            | 10                        | 70.28                        | 199.02                       | 458.26                       | 129.35                      | 236.30                      | 0.05                                                     | 1.95                 | 0.60                |
| 13            | 10                        | 56.97                        | 209.30                       | 527.61                       | 118.02                      | 255.31                      | 0.05                                                     | 2.25                 | 0.70                |
| 15            | 10                        | 91.90                        | 281.40                       | 329.28                       | 165.04                      | 329.28                      | 0.04                                                     | 1.96                 | 0.60                |
| 18            | 10                        | 58.37                        | 251.05                       | 775.26                       | 124.64                      | 343.48                      | 0.05                                                     | 2.86                 | 0.91                |
| 20            | 5                         | 87.07                        | 352.15                       | 795.15                       | 181.99                      | 400.79                      | 0.03                                                     | 2.01                 | 0.63                |
| 22            | 5                         | 58.43                        | 179.60                       | 695.30                       | 115.47                      | 291.19                      | 0.05                                                     | 3.55                 | 1.09                |
| 24            | 5                         | 65.87                        | 219.26                       | 786.04                       | 130.80                      | 337.62                      | 0.05                                                     | 3.29                 | 1.03                |
| 28            | 5                         | 77.79                        | 259.60                       | 820.47                       | 147.42                      | 366.16                      | 0.04                                                     | 2.86                 | 0.89                |
| 33            | 5                         | 72.00                        | 227.91                       | 812.00                       | 126.30                      | 347.45                      | 0.05                                                     | 3.25                 | 0.99                |
| 36            | 5                         | 83.15                        | 207.49                       | 669.86                       | 167.85                      | 300.46                      | 0.04                                                     | 2.83                 | 0.85                |
| 40            | 5                         | 80.77                        | 186.09                       | 521.36                       | 145.96                      | 252.92                      | 0.04                                                     | 2.37                 | 0.73                |
| 43            | 5                         | 101.17                       | 228.36                       | 648.50                       | 193.51                      | 310.04                      | 0.03                                                     | 2.40                 | 0.72                |
| 51            | 5                         | 157.60                       | 309.56                       | 579.96                       | 252.12                      | 341.61                      | 0.04                                                     | 1.36                 | 0.42                |
| 57            | 5                         | 184.20                       | 358.44                       | 637.84                       | 289.45                      | 386.16                      | 0.02                                                     | 1.27                 | 0.39                |
| 61            | 5                         | 199.56                       | 413.69                       | 736.38                       | 318.50                      | 442.45                      | 0.02                                                     | 1.30                 | 0.40                |
| 64            | 5                         | 241.75                       | 464.77                       | 800.19                       | 369.50                      | 493.74                      | 0.02                                                     | 1.20                 | 0.37                |
| 67            | 5                         | 231.76                       | 489.76                       | 860.37                       | 349.93                      | 519.18                      | 0.02                                                     | 1.28                 | 0.40                |
| 70            | 5                         | 240.10                       | 514.93                       | 895.37                       | 358.21                      | 541.94                      | 0.02                                                     | 1.27                 | 0.40                |
| 74            | 5                         | 236.07                       | 551.93                       | 973.43                       | 339.41                      | 580.63                      | 0.02                                                     | 1.34                 | 0.41                |
| 81            | 5                         | 200.42                       | 538.59                       | 920.82                       | 333.72                      | 555.02                      | 0.02                                                     | 1.34                 | 0.40                |
